# Supplementary material for: Highly efficient photocatalytic CO2reduction by a ruthenium complex sensitizing g-C3N4/MOF hybrid photocatalyst
Source: Royal Society of Chemistry journal article supplement (doi:10.1039/d1nj01010g), 2021-01-01
Supplement: d1nj01010g1.pdf [file d1nj01010g1.pdf]

## Supporting Information

### Highly Efficient Photocatalytic CO<sub>2</sub> Reduction by a Ruthenium Complex Sensitizing g-C<sub>3</sub>N<sub>4</sub>/MOF Hybrid Photocatalyst

Wenxuan Sun, Xuyang Chen, Xiangfen Meng and Yan Gao\*

State Key Laboratory of Fine Chemicals, Dalian University of Technology (DUT),  
Dalian 116024, China.

\*Corresponding author.

E-mail address: dr.gaoyan@dlut.edu.cn

#### Experimental section

##### Materials

Chemical reagents were purchased from Aladdin or Sigma-Aldrich and used without further purification: RuCl<sub>3</sub>·3H<sub>2</sub>O, LiCl, Co(NO<sub>3</sub>)<sub>2</sub>·6H<sub>2</sub>O, RuCl<sub>3</sub>·3H<sub>2</sub>O, 2,2-bipyridyl (bpy), KPF<sub>6</sub>, urea, NaHCO<sub>3</sub>, 2,5-Dihydroxyterephthalic acid (H<sub>4</sub>DOBDC), 2,2'-bipyridyl-4,4'-dicarboxylic acid (H<sub>2</sub>dcbpy), Tetrabutylammonium hexafluorophosphate (NBu<sub>4</sub>PF<sub>6</sub>), ethanol, methanol, acetic acid, deionized water, acetonitrile (MeCN), N,N-dimethylformamide (DMF), and triethanolamine (TEOA).

##### Preparation of ruthenium complexes (RuL<sub>2</sub>L')

The [Ru<sup>II</sup>(bpy)<sub>2</sub>(H<sub>2</sub>dcbpy)](PF<sub>6</sub>)<sub>2</sub> complex was synthesized according to the reported<sup>[1]</sup>.

##### Synthesis of exfoliated g-C<sub>3</sub>N<sub>4</sub>

The exfoliated g-C<sub>3</sub>N<sub>4</sub> was prepared according to the literature<sup>[2]</sup>.

##### Preparation of g-C<sub>3</sub>N<sub>4</sub>/MOF

Different amount g-C<sub>3</sub>N<sub>4</sub> samples (100 mg, 200 mg and 400 mg) were ultrasound treated in 10 mL DMF for 30 min. And the solid mixture of H<sub>4</sub>DOBDC (40 mg, 0.2 mmol) and Co(NO<sub>3</sub>)<sub>2</sub>·6H<sub>2</sub>O (233 mg, 0.8 mmol) were dissolved in a 20 mL solution that consisted of DMF, water and EtOH at a volume ratio of 2:1:1, which was ultrasound to form a homogeneous solution. Then the solution of g-C<sub>3</sub>N<sub>4</sub> was added slowly to the mixed solution under ultrasound. Subsequently, the mixed solution was

transferred into 50 mL Teflonlined autoclave and treated in an oven at 120 °C for 24 h. The resultant suspension was filtered and washed with H<sub>2</sub>O, DMF, and EtOH and finally dried at 100 °C for 6 h in a vacuum desiccator.

### **Preparation of RuL<sub>2</sub>L'@C<sub>3</sub>N<sub>4</sub>/MOF**

The g-C<sub>3</sub>N<sub>4</sub>/MOF complex was dispersed in 20 mL DMF, the same amount of RuL<sub>2</sub>L' as g-C<sub>3</sub>N<sub>4</sub> added into the solution (Table. S1). The suspension was stirred at room temperature in the dark overnight<sup>[3]</sup>. Here, the obtained samples RuL<sub>2</sub>L'@xC<sub>3</sub>N<sub>4</sub>/MOF containing 100, 200 and 400 mg C<sub>3</sub>N<sub>4</sub> named RuL<sub>2</sub>L'@100C<sub>3</sub>N<sub>4</sub>/MOF, RuL<sub>2</sub>L'@200C<sub>3</sub>N<sub>4</sub>/MOF and RuL<sub>2</sub>L'@400C<sub>3</sub>N<sub>4</sub>/MOF, respectively.

### **Characterizations**

Crystal phase structures were conducted via a powder X-ray diffraction (XRD, SmartLab 9KW), the morphology and microstructure of all samples were analyzed by scanning electron microscopy (SEM, Bruker Smart APEX II) and transmission electron microscopy (TEM, Tecnai G2 F30). The chemical states on the surface of photocatalysis were measured by X-ray photoelectron spectroscopy (XPS, ESCALAB XI+). The photoluminescence (PL) spectra were recorded on the steady-state spectrophotometer (HORIBA Jobin Yvon FluoroMax-4). Solid-state UV-vis diffuse absorption spectra were obtained with Lambda 750S spectrophotometer. The infrared spectra were obtained using a Fourier transform infrared (FT-IR) spectrometer (Bruker VERTEX 80v).

### **Photocatalytic Performance Test**

Typically, a mixture of 1 mg RuL<sub>2</sub>L'@C<sub>3</sub>N<sub>4</sub>/MOF, 1 mg bpy, proper amount of TEOA as electronic donor and 4 mL MeCN was placed in the Schlenk cube (25 mL). And the mixture degassed by CO<sub>2</sub> for half an hour. After the CO<sub>2</sub> was saturated, the solution was irradiated by the 300W Xe almp equipped with a 400 nm cutoff filter. The generated gas was analyzed by gas chromatograph (GC-7900) every half hour.

### **Mott-Schottky, transient photocurrent responses and electrochemical impedance spectroscopy (EIS)**

The sample (3 mg) was dissolved in 1 mL H<sub>2</sub>O/EtOH = 3:1 and ultrasound for 30 minutes. Then 80 µL nafion added in the mixture solution and ultrasound for 30 minutes. The preparation for working electrode was that 0.1 mL slurry was dropped onto FTO and dried at 40 °C for 10 minutes. The solution purged with Ar before

electrochemistry test. The reference electrode and counter electrode were Ag/AgCl electrode and Pt electrode, respectively. A solution of 0.5 M Na<sub>2</sub>SO<sub>4</sub> served as electrolyte solution for Mott-Schottky, transient photocurrent responses and EIS measurements.

### **Cyclic Voltammogram (CV) tests**

1 mM RuL<sub>2</sub>L' was dissolved in 30 mL CH<sub>3</sub>CN with 0.1 M NBu<sub>4</sub>PF<sub>6</sub>. CV was tested in a standard three-electrode cell. The reference electrode, counter electrode and working electrode were saturated Ag/AgNO<sub>3</sub>, Pt electrode and glassy carbon electrode, respectively.

### **References**

1. P. Pearson, A. M. Bond, G. B. Deacon, C. Forsyth and L. Spiccia, *Inorg. Chim. Acta*, 2008, **361**, 601-612.
2. J. Xu, L. Zhang, R. Shi and Y. Zhu, *J. of Mat. Chem. A, Mat. for En. and Sustain.*, 2013, **1**, 14766.
3. R. Kuriki, M. Yamamoto, K. Higuchi, Y. Yamamoto, M. Akatsuka, D. Lu, S. Yagi, T. Yoshida, O. Ishitani and K. Maeda, *Angew. Chem. Int. Ed. Engl*, 2017, **56**, 4867-4871.

**Tab. S1.** Synthesis of different content of RuL<sub>2</sub>L'@xC<sub>3</sub>N<sub>4</sub>/MOF

| number | g-C <sub>3</sub> N <sub>4</sub> | RuL <sub>2</sub> L' | Co <sup>2+</sup> | H <sub>4</sub> DOBDC | named                                                         |
|--------|---------------------------------|---------------------|------------------|----------------------|---------------------------------------------------------------|
| 1      | 100 mg                          | 100 mg              | 233 mg           | 40 mg                | RuL <sub>2</sub> L'@100C <sub>3</sub> N <sub>4</sub> -<br>MOF |
| 2      | 200 mg                          | 200 mg              | 233 mg           | 40 mg                | RuL <sub>2</sub> L'@200C <sub>3</sub> N <sub>4</sub> -<br>MOF |
| 4      | 400 mg                          | 400 mg              | 233 mg           | 40 mg                | RuL <sub>2</sub> L'@400C <sub>3</sub> N <sub>4</sub> -<br>MOF |

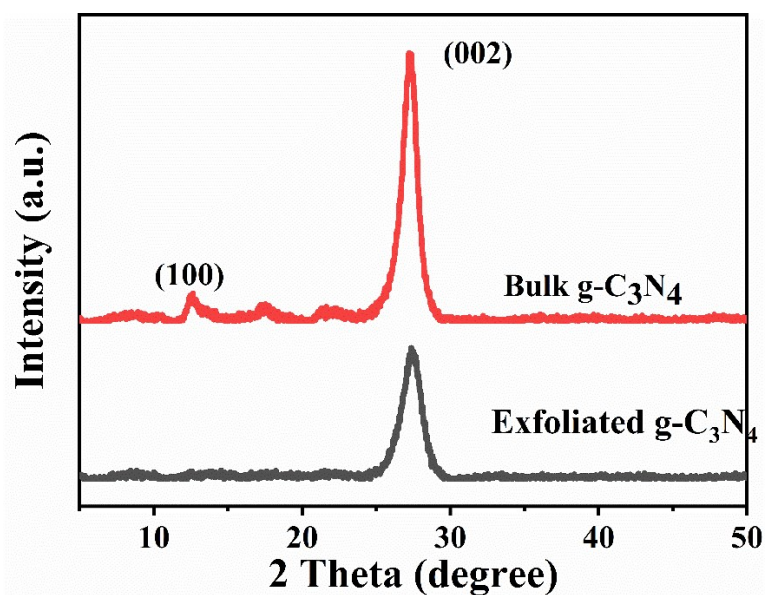

**Fig. S1.** XRD of bulk g-C<sub>3</sub>N<sub>4</sub> and exfoliated g-C<sub>3</sub>N<sub>4</sub>.

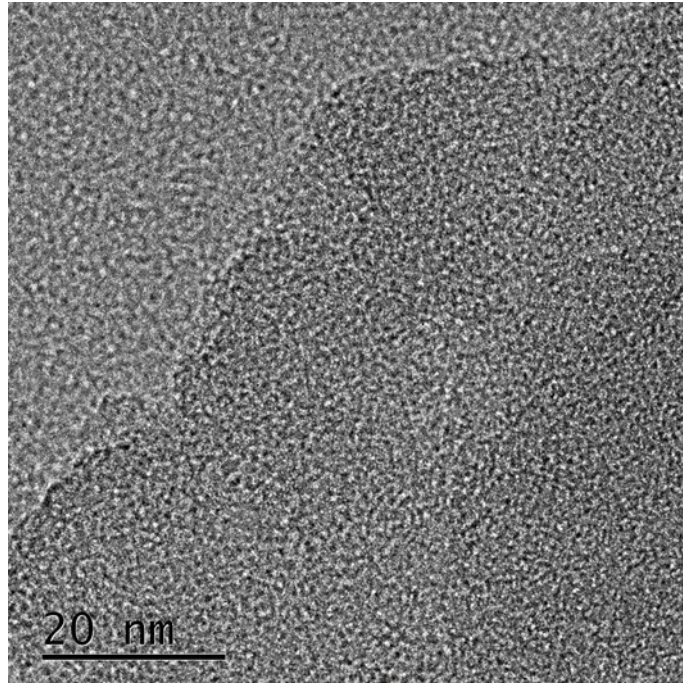

**Fig. S2.** TEM image of exfoliated g-C<sub>3</sub>N<sub>4</sub>.

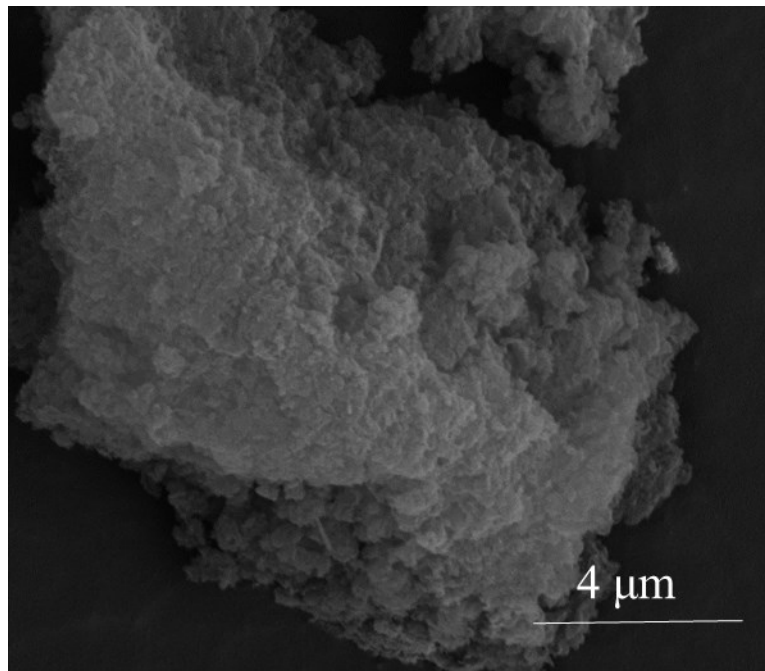

**Fig. S3.** SEM image of exfoliated g-C<sub>3</sub>N<sub>4</sub>.

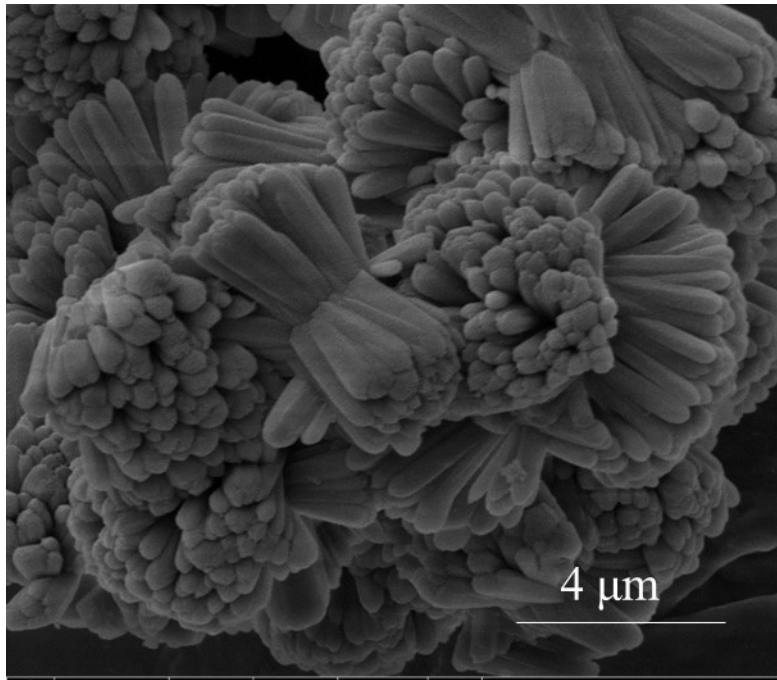

**Fig. S4.** SEM image of Co-MOF-74.

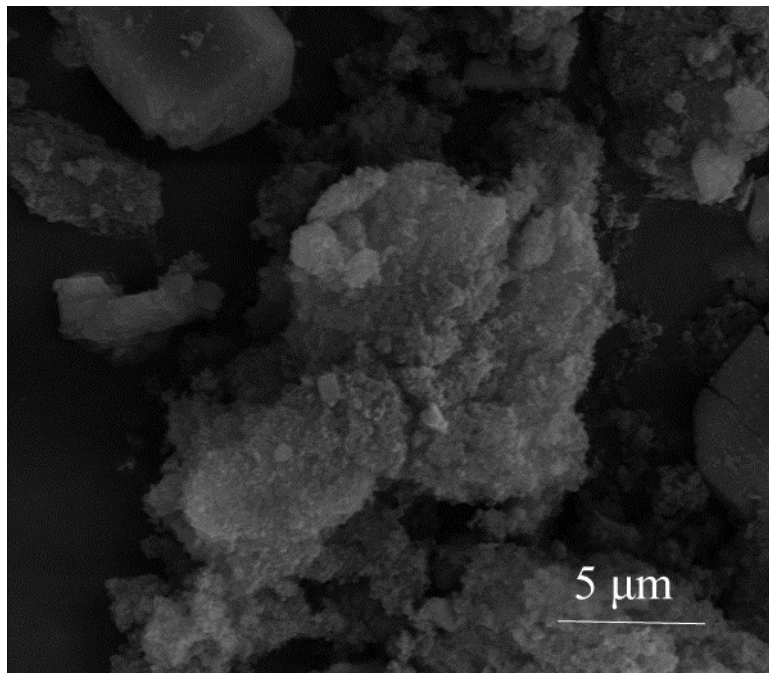

**Fig. S5.** SEM image of RuL<sub>2</sub>L'@200C<sub>3</sub>N<sub>4</sub>/MOF

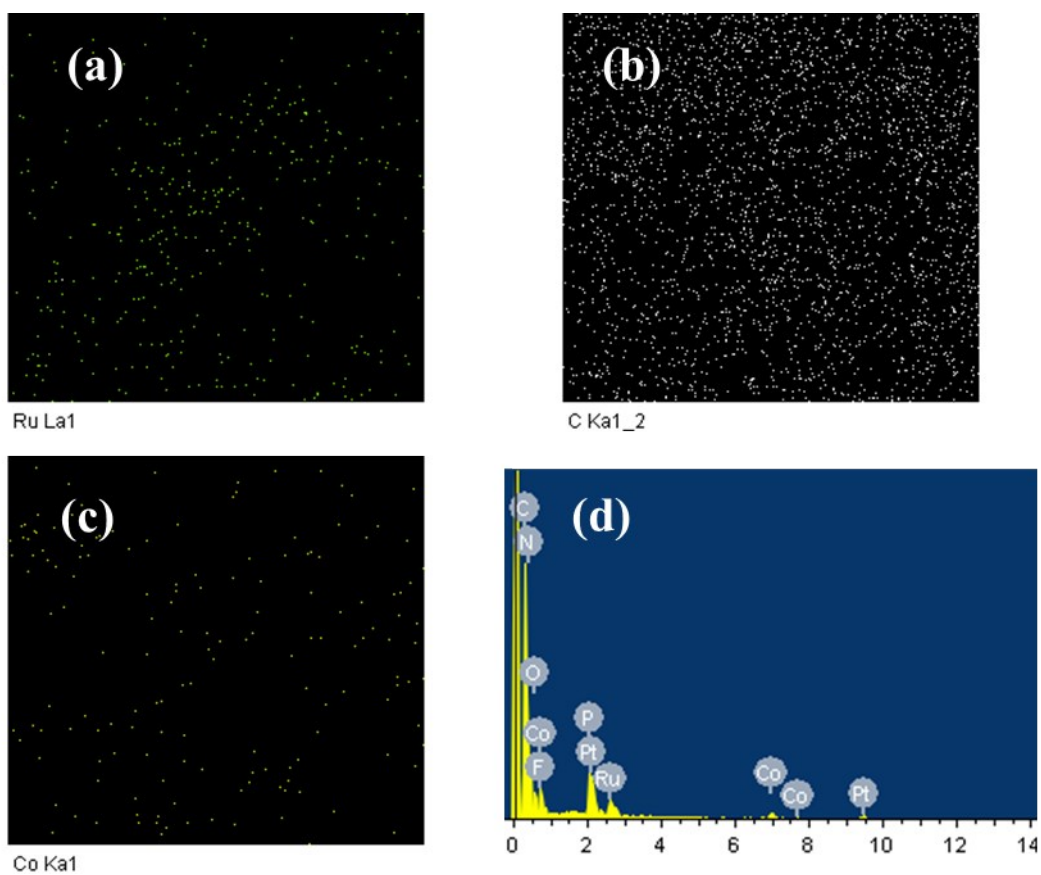

**Fig. S6.** (a-c) Elemental mapping and (d) EDS of RuL<sub>2</sub>L'@200C<sub>3</sub>N<sub>4</sub>/MOF composite photocatalysts

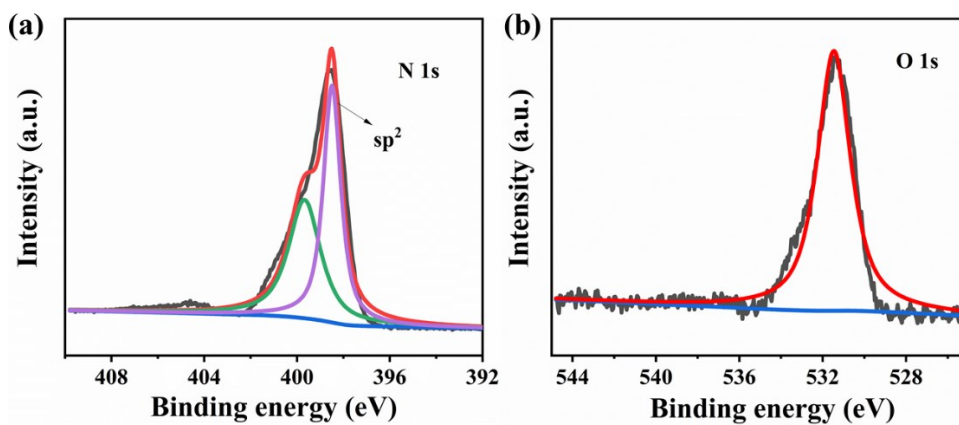

**Fig. S7.** XPS spectra of the RuL<sub>2</sub>L'@200C<sub>3</sub>N<sub>4</sub>/MOF: N 1s (a) and O 1s (b)

**Tab. S2.** Specific surface areas, pore volumes and pore diameters for g-C<sub>3</sub>N<sub>4</sub>, RuL<sub>2</sub>L'@C<sub>3</sub>N<sub>4</sub>/MOF and Co-MOF-74

| Sample                                                 | S <sub>BET</sub> /m <sup>2</sup> •g <sup>-1</sup> | V <sub>pore</sub> /cm <sup>3</sup> •g <sup>-1</sup> | d <sub>pore</sub> /nm |
|--------------------------------------------------------|---------------------------------------------------|-----------------------------------------------------|-----------------------|
| g-C <sub>3</sub> N <sub>4</sub>                        | 4.8                                               | 0.025                                               | 18.3                  |
| RuL <sub>2</sub> L'@C <sub>3</sub> N <sub>4</sub> /MOF | 50.9                                              | 0.23                                                | 21.0                  |
| Co-MOF-74                                              | 530.0                                             | 0.28                                                | 25.8                  |

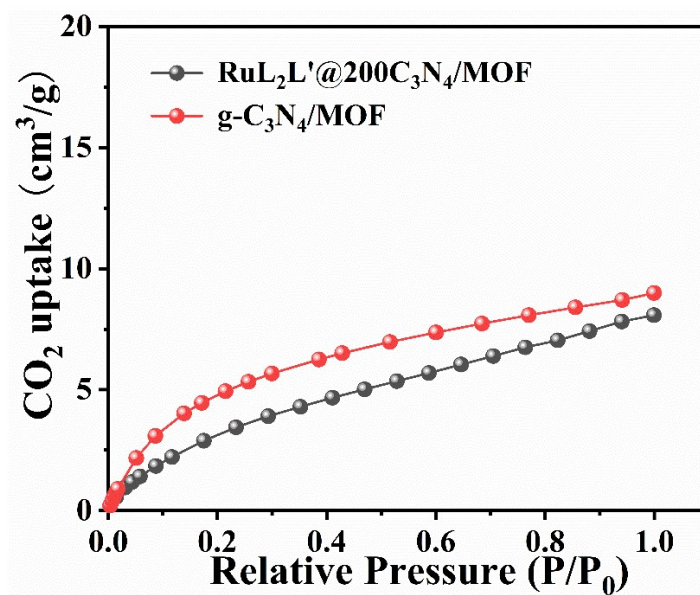

**Fig. S8.** CO<sub>2</sub> adsorption isotherms of the RuL<sub>2</sub>L'@200C<sub>3</sub>N<sub>4</sub>/MOF and g-C<sub>3</sub>N<sub>4</sub>/MOF.

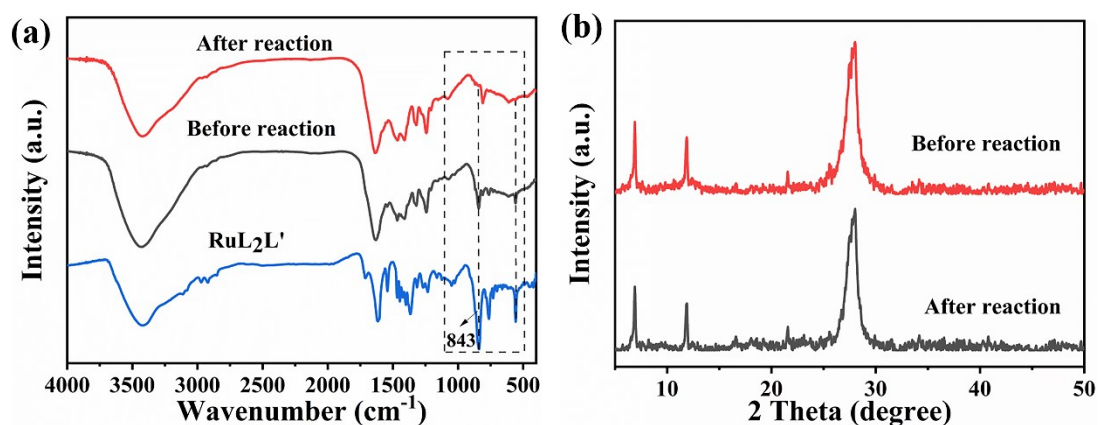

**Fig. S9.** FT-IR (a) and XRD (b) patterns of RuL<sub>2</sub>L'@200C<sub>3</sub>N<sub>4</sub>/MOF before and after reaction



**Tab. S3.** ICP-MS of the RuL<sub>2</sub>L'@200C<sub>3</sub>N<sub>4</sub>/MOF after every cycle

| cycle times | content of RuL <sub>2</sub> L' |
|-------------|--------------------------------|
| 1st         | 0.175                          |
| 2th         | 0.098                          |
| 3rd         | 0.054                          |

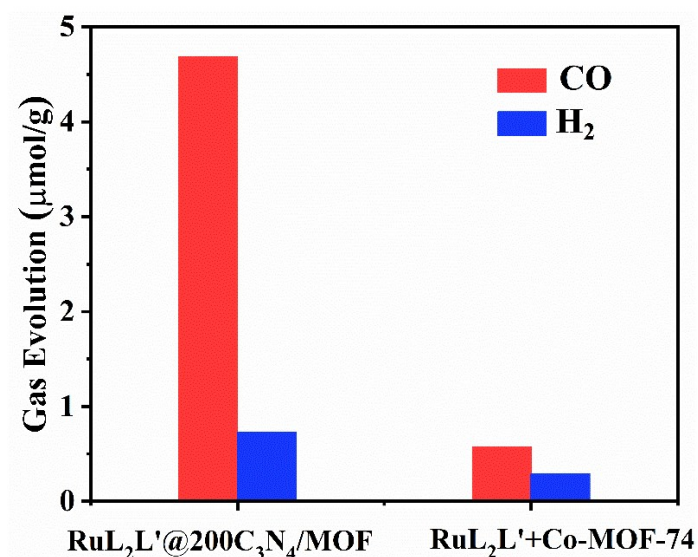**Fig. S10.** The photocatalysis of RuL<sub>2</sub>L'@200C<sub>3</sub>N<sub>4</sub>/MOF and RuL<sub>2</sub>L' (0.168 mg) + Co-MOF-74 1 mg under the same reaction conditions.**Tab. S4.** The production of samples within 3 hours under the same conditions

| Condition                       | CO production (μmol/g) | H <sub>2</sub> production (μmol/g) |
|---------------------------------|------------------------|------------------------------------|
| g-C <sub>3</sub> N <sub>4</sub> | 3.9                    | trace                              |
| Co-MOF-74                       | 10.8                   | trace                              |
| RuL <sub>2</sub> L'             | 21.6                   | trace                              |

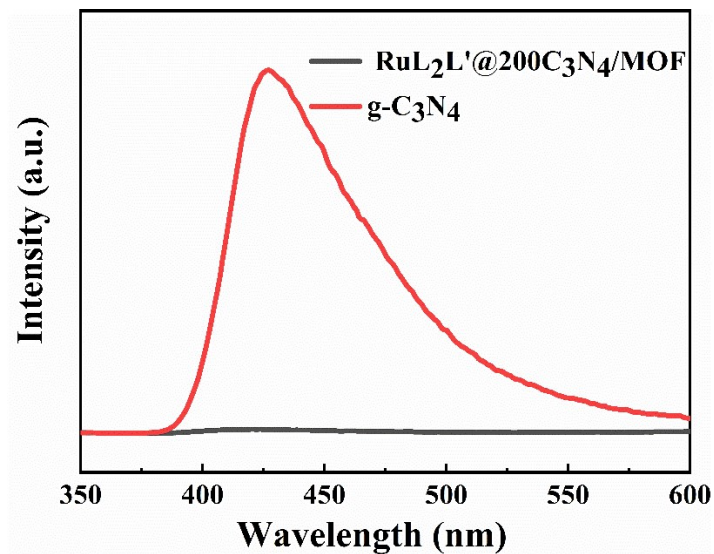

Fig. S11. PL spectra of g-C<sub>3</sub>N<sub>4</sub> and RuL<sub>2</sub>L'@C<sub>3</sub>N<sub>4</sub>/MOF

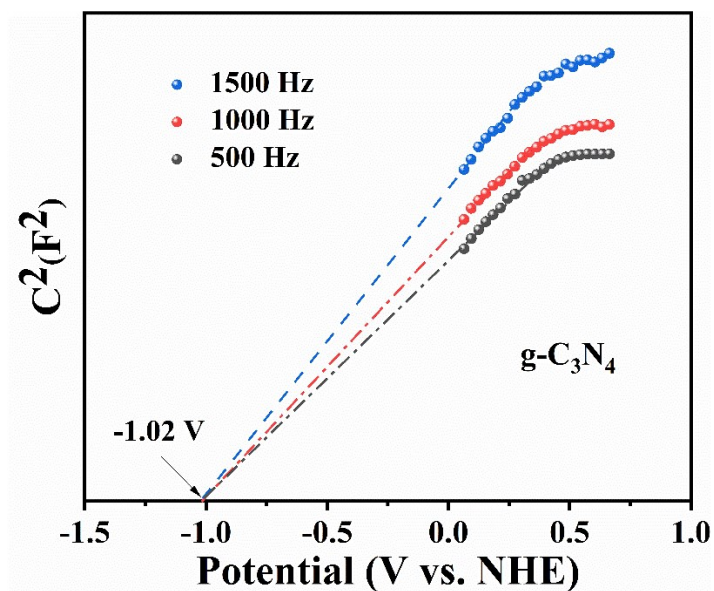

Fig. S12. The Mott-Schottky plots of g-C<sub>3</sub>N<sub>4</sub>.

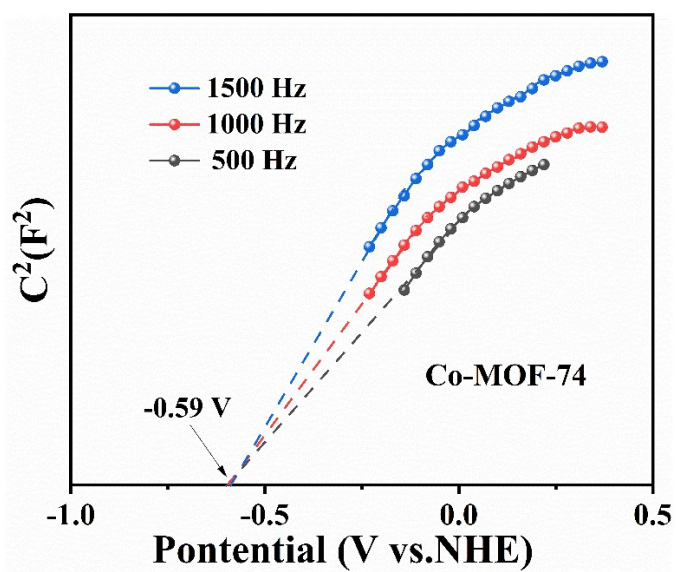

Fig. S13. The Mott-Schottky plots of Co-MOF-74.

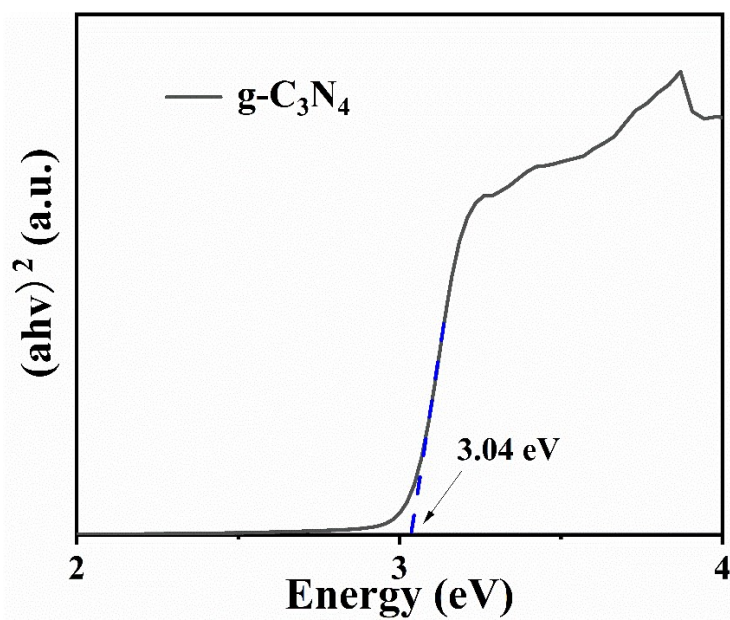

Fig. S14. The band gap spectra of g-C<sub>3</sub>N<sub>4</sub>.

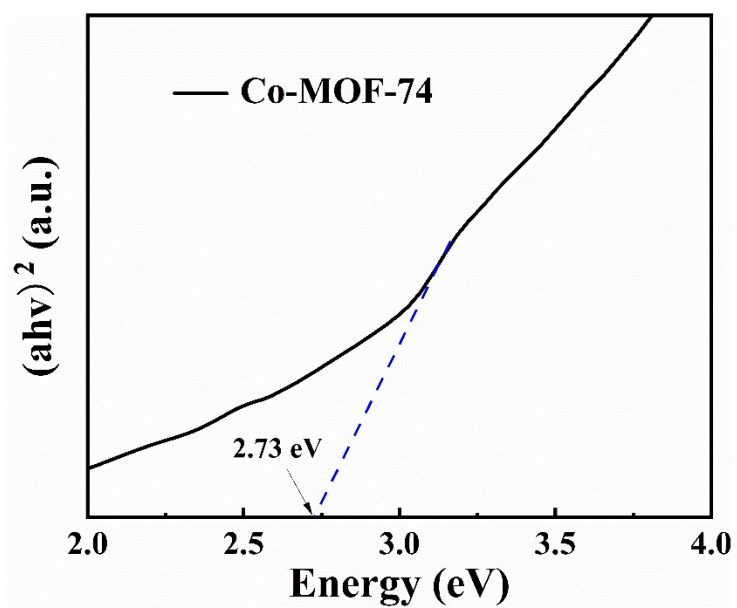

Fig. S15. The band gap spectra of Co-MOF-74.

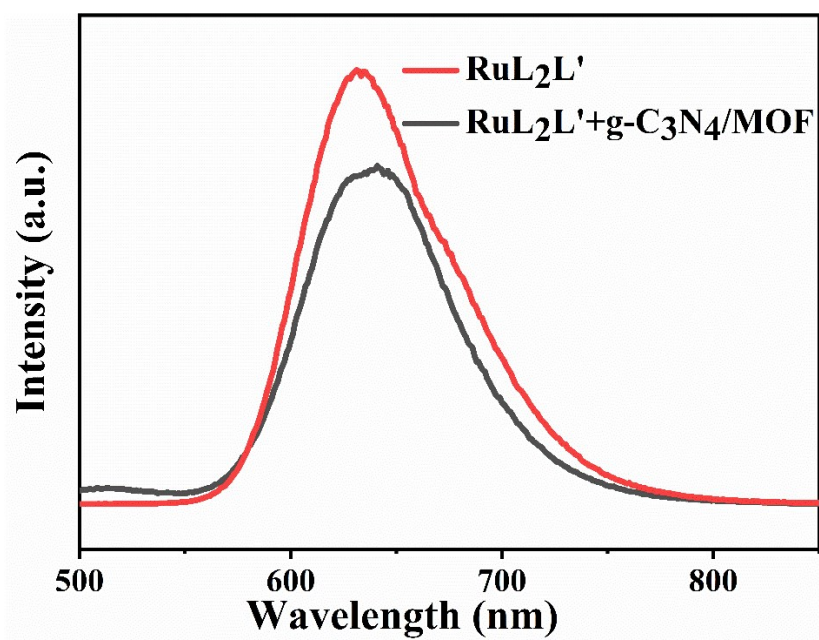

Fig. S16. PL spectrum of RuL<sub>2</sub>L' in g-C<sub>3</sub>N<sub>4</sub>/MOF

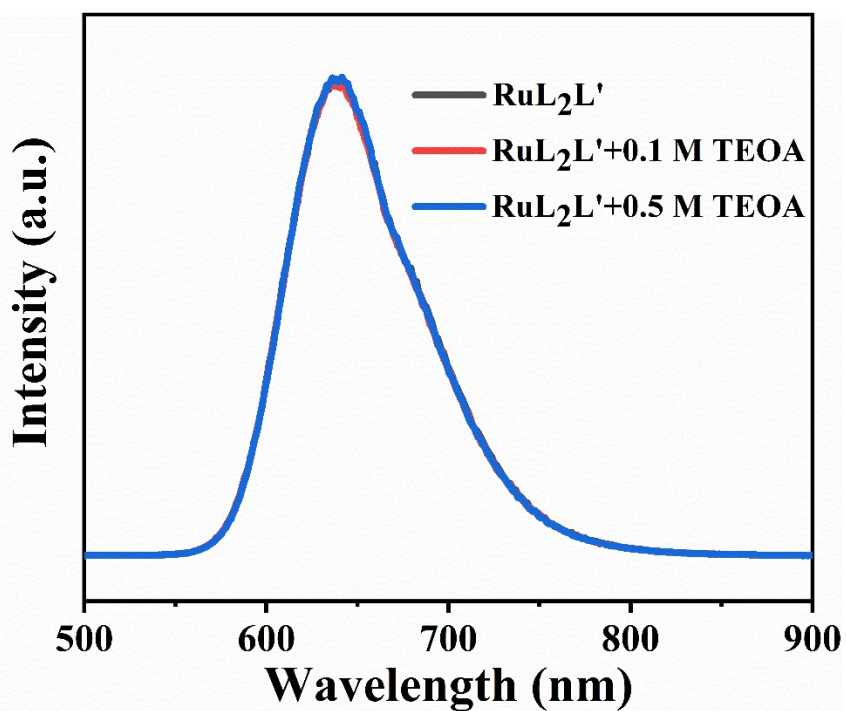

Fig. S17. PL spectrum of RuL<sub>2</sub>L' with addition of TEOA (0, 100, 500 mM).

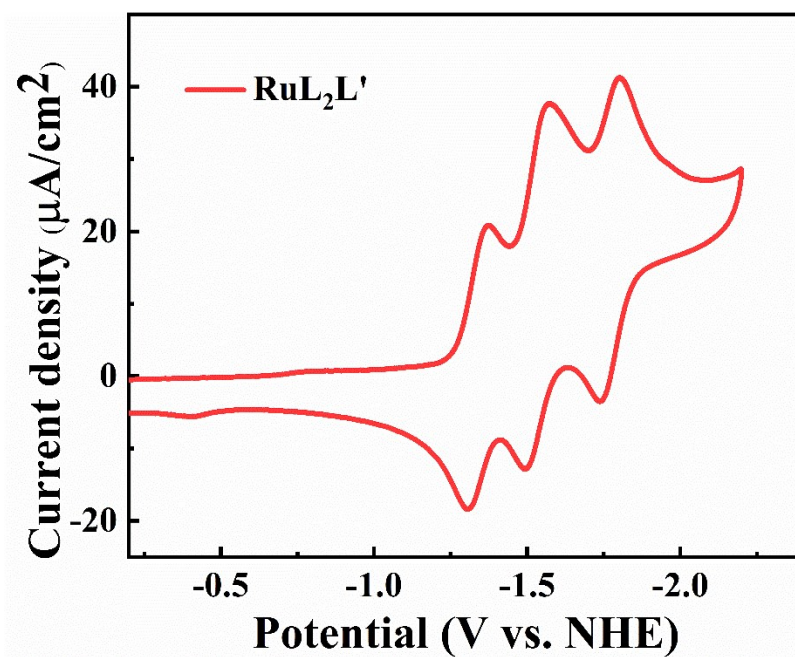

Fig. S18. The CV of RuL<sub>2</sub>L' in CH<sub>3</sub>CN with 0.1 M NBu<sub>4</sub>PF<sub>6</sub> as supporting electrolyte under N<sub>2</sub> atmosphere.
